# Supplementary material for: NUAK1 coordinates growth factor-dependent activation of mTORC2 and Akt signaling
Source: PubMed Central journal article supplement (PMC10740258; doi:10.1186/s13578-023-01185-2), 2023-12-22
Supplement: 13578_2023_1185_MOESM1_ESM.pdf [file 13578_2023_1185_MOESM1_ESM.pdf]

## NUAK1 coordinates growth factor-dependent activation of mTORC2 and Akt signaling.

Mario Palma<sup>1\*</sup>, Elizabeth Riffo<sup>1</sup>, Alejandro Farias<sup>1</sup>, Viviana Coliboro-Dannich<sup>1</sup>, Luis Espinoza-Francine<sup>1</sup>, Emilia Escalona<sup>1</sup>, Roberto Amigo<sup>2</sup>, José L. Gutiérrez<sup>2</sup>, Roxana Pincheira<sup>1</sup> and Ariel F. Castro<sup>1\*</sup>.

<sup>1</sup>Laboratorio de Transducción de Señales y Cáncer. Departamento de Bioquímica y Biología Molecular. Facultad Cs. Biológicas. Universidad de Concepción, Chile.

<sup>2</sup>Laboratorio de Regulación Transcripcional. Departamento de Bioquímica y Biología Molecular. Facultad Cs. Biológicas. Universidad de Concepción, Chile.

\*Correspondence: Mario Palma: [mpalma@hsp.harvard.edu](mailto:mpalma@hsp.harvard.edu); Ariel F. Castro: [arcastro@udec.cl](mailto:arcastro@udec.cl)

### Supplementary Information

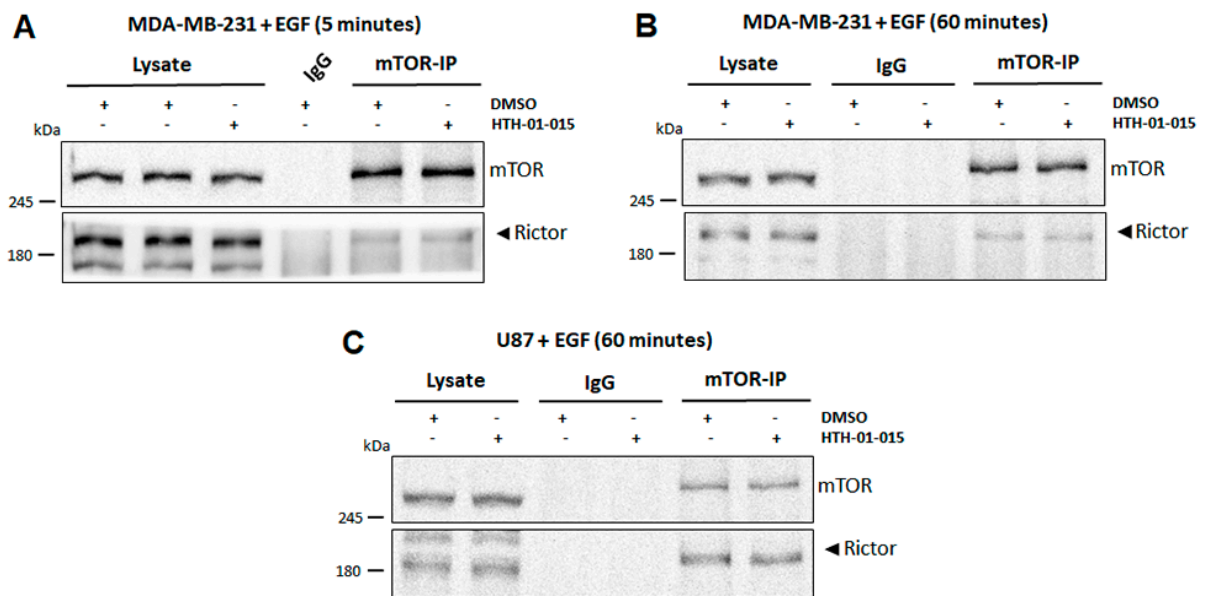

**Figure S1. NUAK1 inhibition does not impact on mTOR-Rictor association.**

**A.** Immunoblot (IB) of the Immunoprecipitation (IP) of endogenous mTOR and Co-IP of endogenous Rictor after 5 minutes of EGF stimulation in MDA-MB-231 cells. **B-C.** IB of IP of endogenous mTOR and Co-IP of endogenous Rictor after 60 minutes of EGF stimulation in MDA-MB-231 (B) and U87 (C) cells.

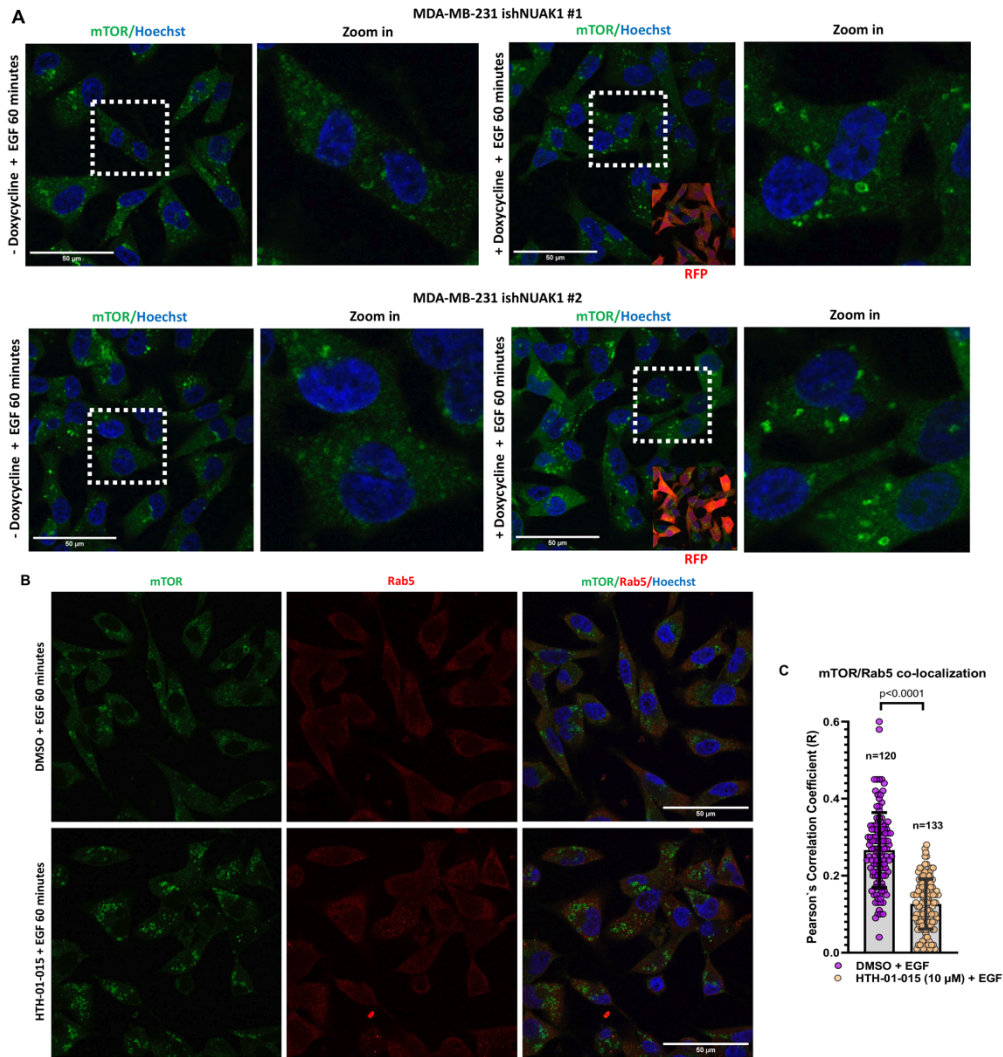

**Figure S2. NUAK1 effect on mTOR subcellular distribution.**

**A.** Representative confocal images of mTOR in MDA-MB-231 cells expressing inducible shRNAs for NUAK1. Inducible models were treated with or without doxycycline by 24 hours and then serum-starved overnight followed by stimulation with EGF for 60 minutes. Green, mTOR; Red, RFP; Blue, Nuclei. **B.** Representative confocal images of mTOR and Rab5 in MDA-MB-231 cells serum-starved overnight followed by 90 minutes of pretreatment with DMSO or HTH-01-015 (10  $\mu$ M) before stimulation with EGF for 60 minutes. Red, Rab5; Green, mTOR; Blue, Nuclei. **C.** Quantification of mTOR/Rab5 co-localization from B. Each bar represents the mean  $\pm$  SD, Student t test.

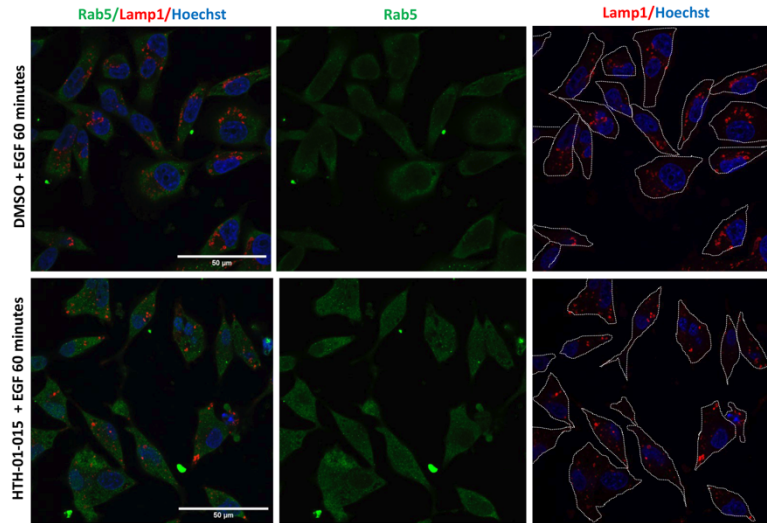

**Figure S3. NUAK1 inhibition does not affect early endosomes distribution.**

Representative confocal images of Rab5 and Lamp1 under NUAK1 inhibition in MDA-MB-231 after EGF stimulation for 60 minutes. Left, merge; Right, Rab5 and Lamp1 + Hoechst images. Cells borders were marked with a boundary. Green, Rab5; Red, Lamp1; Blue, nuclei

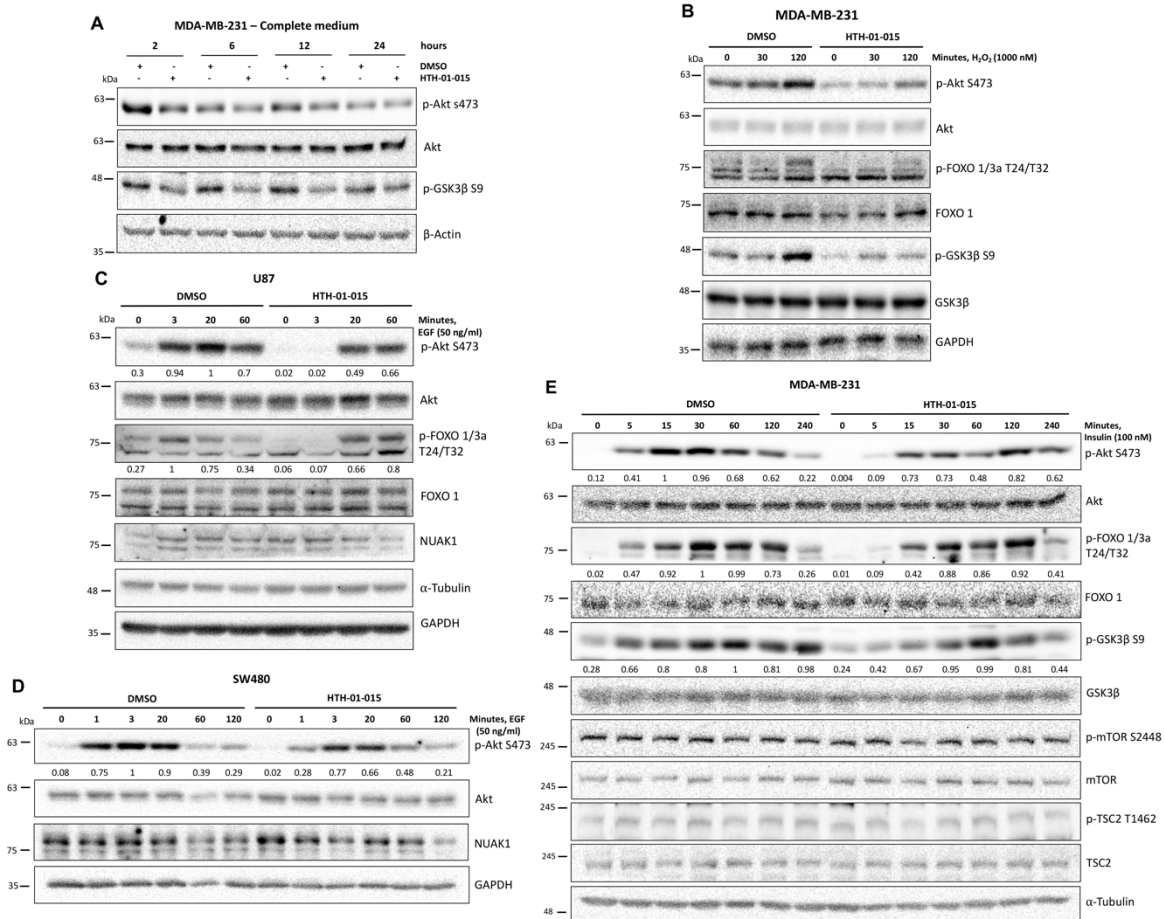

**Figure S4. NUAK1 effect on Akt signaling under different cellular conditions.**

**A.** IB of the effect of NUAK1 inhibition on Akt signaling in normal growth conditions. MDA-MB-231 cells were treated with DMSO or HTH-01-015 (10  $\mu$ M) for 2, 6, 12 and 24 hours.  $\beta$ -actin was used as loading control. **B.** IB of the effect of NUAK1 inhibition on the Akt signaling upon oxidative stress. MDA-MB-231 cells were pretreated with DMSO or HTH-01-015 (10  $\mu$ M) by 1-hour before treatment with H<sub>2</sub>O<sub>2</sub> by 0, 30 and 120 minutes. GAPDH was used as loading control. **C-D.** IB of Akt signaling under NUAK1 inhibition in U87 (C) and SW480 (D) cells serum-starved overnight followed by 1-hour of pretreatment with DMSO or HTH-01-015 (10  $\mu$ M) before stimulation with EGF. **E.** IB of Akt signaling under NUAK1 inhibition in MDA-MB-231 cells serum-starved overnight followed by 1-hour of pretreatment with DMSO or HTH-01-015 (10  $\mu$ M) before stimulation with Insulin.

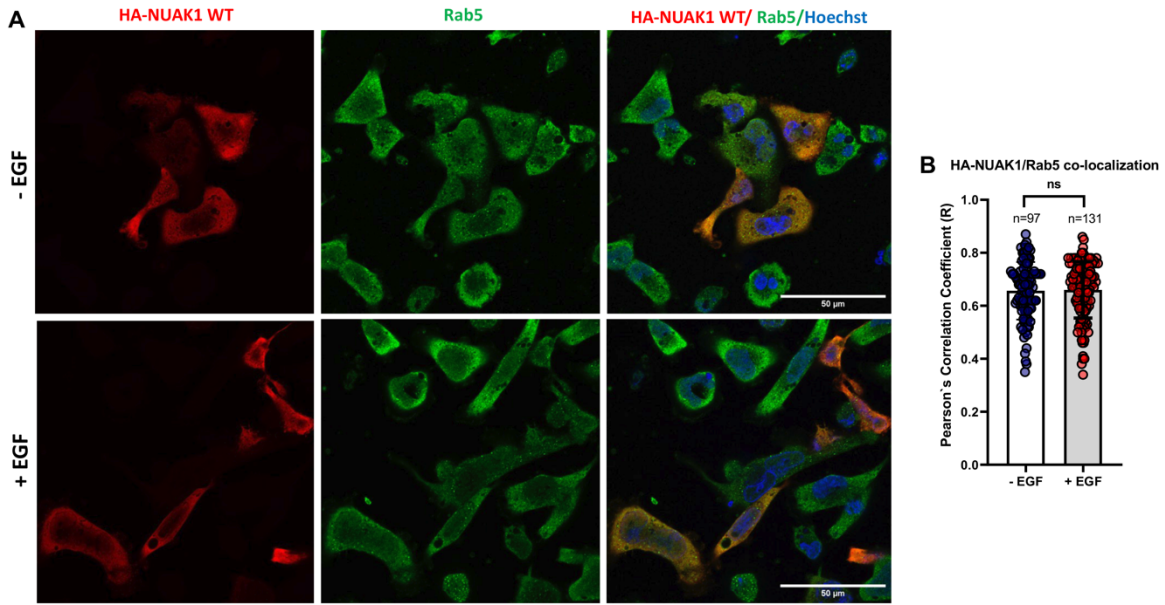

**Figure S5. NUAK1 co-localize with endogenous Rab5.**

**A.** IF of MDA-MB-231 cells after 0 (-EGF) and 15 (+EGF) minutes of EGF stimulation. Representative confocal images for HA-NUAK1 WT and endogenous Rab5. Red, HA-Tagged-NUAK1; Green, endogenous Rab5 (early-endosome marker); Blue, nuclei. **B.** Quantification of HA-NUAK1/Rab5 co-localization from A. Each bar represents the mean  $\pm$  SD, not significant (ns), Student t test.

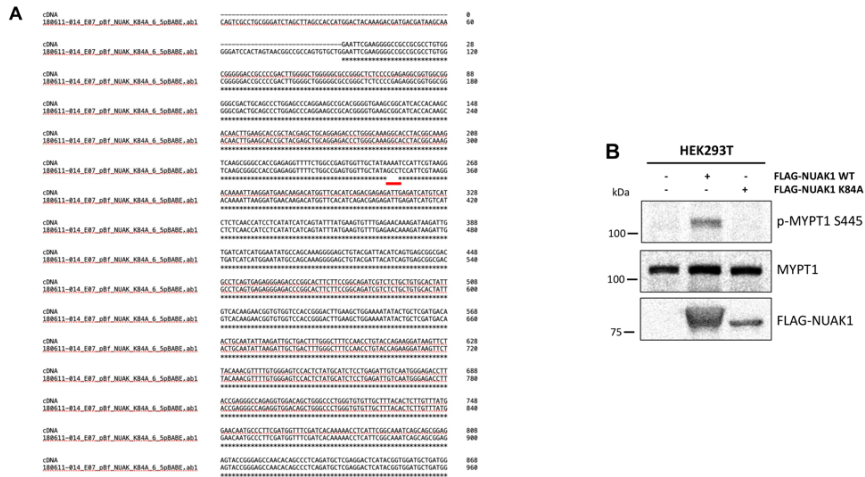

**Figure S6. Validation of NUAK1 Kinase Dead mutant (K84A).**

**A.** Alignment of human NUAK1 WT (cDNA) with the sequence obtained by sequencing of human NUAK1 K84A. The Alignment validated the mutation at Lysine 84 (K84) by Alanine (A). **B.** IB of the activity of FLAG-NUAK1 WT and FLAG-NUAK1 K84A. phospho-MYPT1 at Ser-445 was used as a positive control. NUAK1 K84A mutant does not induced MYPT1 phosphorylation.

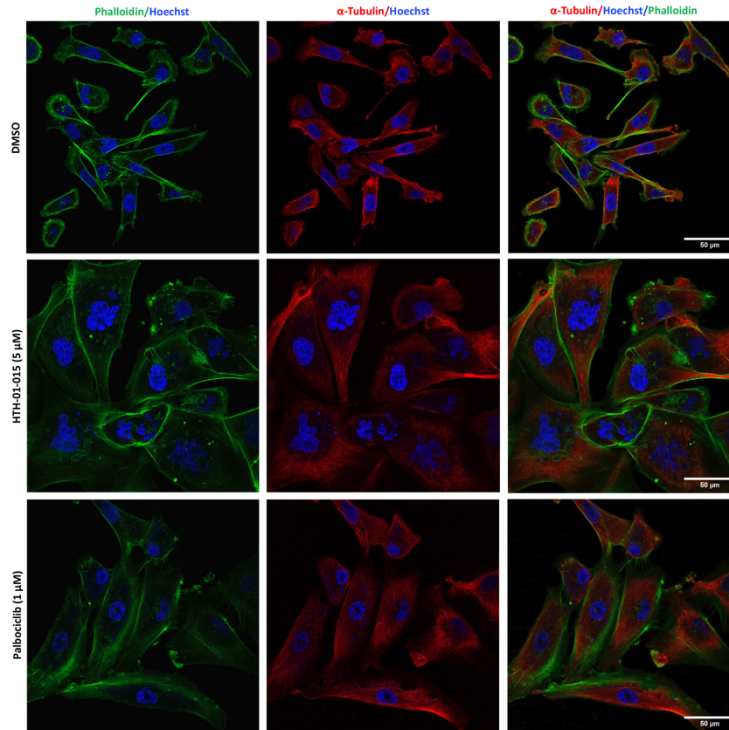

**Figure S7. Long-term inhibition of NUA1 dramatically induces morphological changes.**

Representative confocal images of MDA-MB-231 cells treated with DMSO, HTH-01-015 (5 μM) or Palbociclib (1 μM) (used as a positive control) for 4 days. Red, α-tubulin; Green, Phalloidin (F-actin); Blue, nuclei (n=3).
